# Supplementary material
Source: Research Square preprint supplement (doi:10.21203/rs.3.rs-8998079/v1)

## Supplementary Figure 4.

**A**

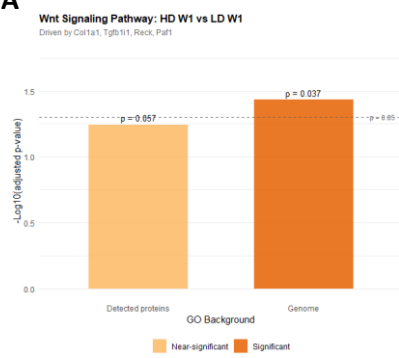

**B**

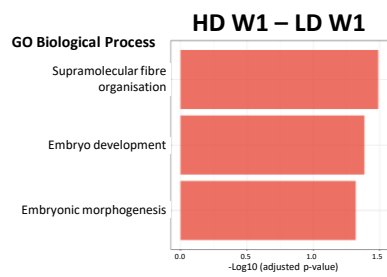

Supplement: Supplementary file 1 [file a7d5a2d009f8587c7d96bbee.pdf]
